# Supplementary material
Source: PubMed Central journal article supplement (PMC3266063)

Figure E1

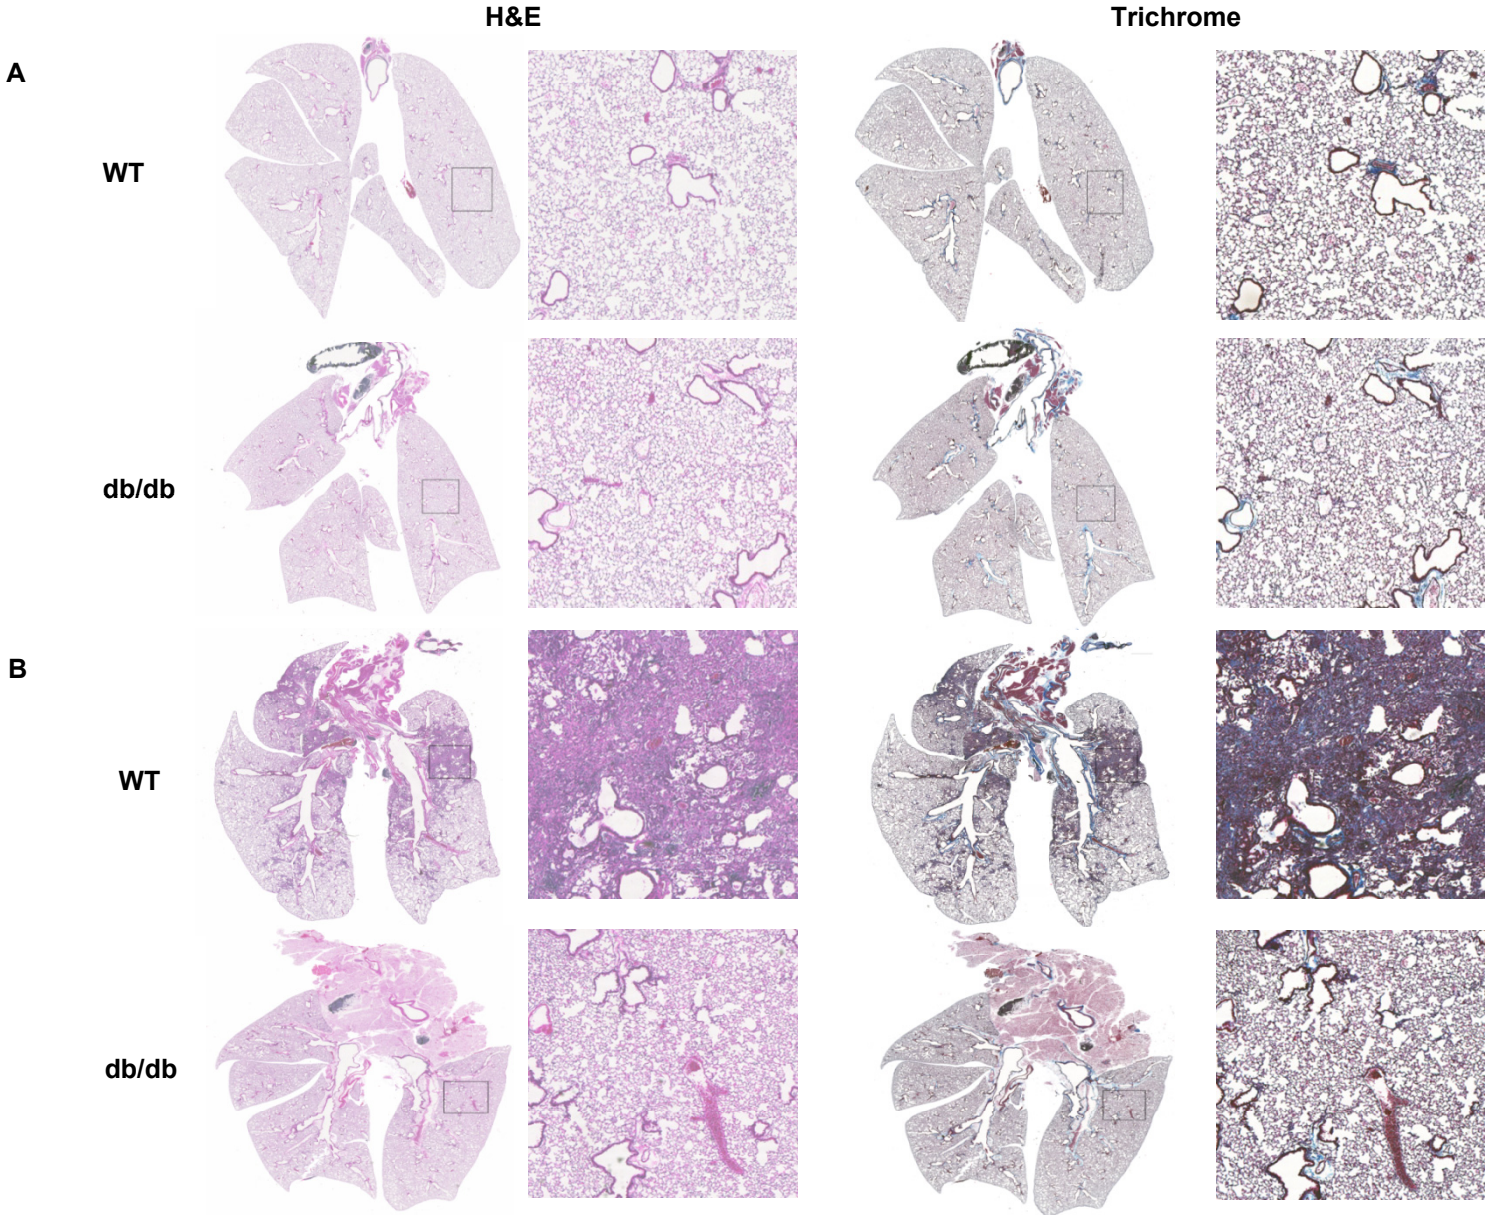

**Figure E2**

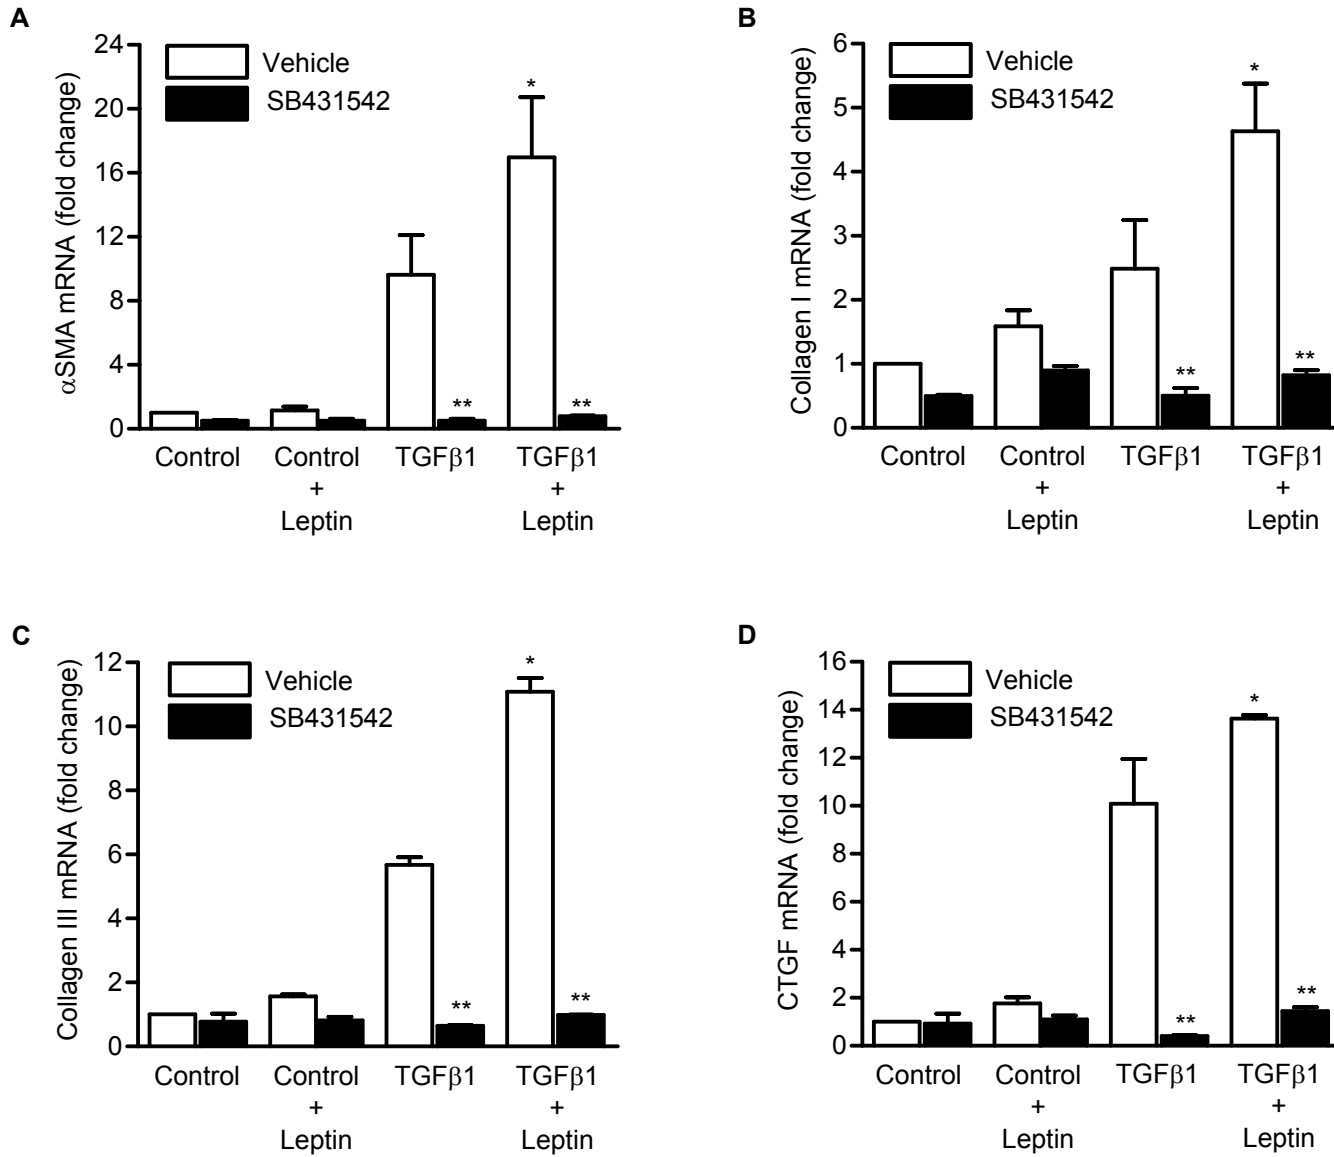

Supplement: supp_183.11.1490_Jain_ODS_figs.pdf [file supp_183.11.1490_Jain_ODS_figs.pdf]
